# Supplementary material for: Synthesis and characterisation of a suite of four chiral pyridyl alcohols derived from (−)-menthol
Source: Royal Society of Chemistry journal article supplement (doi:10.1039/b205872n), 2002-01-01
Supplement: b205872n.pdf [file b205872n.pdf]

## Supplementary data

### Crystallographic data for compound **2c**

The structure was solved by direct methods, SHELXS-86,<sup>1</sup> and refined to a final *R* value of 0.0540 for  $I > 2s(I)$  by full matrix least squares analysis on  $|F|^2$  (236 parameters) using SHELXL-93.<sup>2</sup> All the non-hydrogen atoms were refined anisotropically. The hydrogens, with the exception of the hydroxyl hydrogen which was located from the difference map, were fixed geometrically and those in similar environments were given common temperature factors (CH 0.03651, CH<sub>2</sub> 0.3295, CH<sub>3</sub> 0.07375). The hydroxyl hydrogen was isotropically refined with an independent temperature factor. All calculations were carried out using a VAX-1 mainframe computer. Figures were drawn using SCHAKAL.<sup>3</sup>

1. G. M. Sheldrick, *Acta Cryst.*, 1990, **A46**, 467.
2. G. M. Sheldrick, *SHELXL-93, A computer programme for crystal structure determination*, University of Gottingen, 1993.
3. E. Keller, University of Freiburg, Germany.

Table 1. Crystal data and structure refinement for **2c**

|                        |                                                                                                                 |
|------------------------|-----------------------------------------------------------------------------------------------------------------|
| Identification code    | TS1                                                                                                             |
| Empirical formula      | C <sub>16</sub> H <sub>25</sub> N O                                                                             |
| Formula weight         | 247.37                                                                                                          |
| Temperature            | 293(2) K                                                                                                        |
| Wavelength             | 0.71703 Å                                                                                                       |
| Crystal system         | monoclinic                                                                                                      |
| Space group            | <i>P</i> 2 <sub>1</sub>                                                                                         |
| Unit cell dimensions   | a = 10.460(2) Å    alpha = 90 °.<br>b = 5.5610(4) Å    beta = 110.951(7) °.<br>c = 13.412(2) Å    gamma = 90 °. |
| Volume                 | 728.5(2) Å <sup>3</sup>                                                                                         |
| Z                      | 2                                                                                                               |
| Density (calculated)   | 1.128 Mg/m <sup>3</sup>                                                                                         |
| Absorption coefficient | 0.069 mm <sup>-1</sup>                                                                                          |

|                                        |                                    |
|----------------------------------------|------------------------------------|
| F(000)                                 | 272                                |
| Crystal size                           | 0.5 x 0.5 x 0.15 mm                |
| Theta range for data collection        | 1.64 to 25.21 deg.                 |
| Index ranges                           | -12<=h<=11, 0<=k<=6, 0<=l<=14      |
| Reflections collected                  | 1476                               |
| Independent reflections                | 1413 [R(int) = 0.0392]             |
| Refinement method                      | Full-matrix least-squares on $F^2$ |
| Data / restraints / parameters         | 1413 / 6 / 263                     |
| Goodness-of-fit on $F^2$               | 1.056                              |
| Final $R$ indices [ $I > 2\sigma(I)$ ] | $R_1 = 0.0406$ , $wR_2 = 0.0882$   |
| $R$ indices (all data)                 | $R_1 = 0.1141$ , $wR_2 = 0.1101$   |
| Largest diff. peak and hole            | 0.175 and -0.180 e.Å <sup>-3</sup> |

Table 2. Atomic coordinates ( $\times 10^4$ ) and equivalent isotropic displacement parameters ( $\text{\AA}^2 \times 10^3$ ) for **2c**.  $U(\text{eq})$  is defined as one third of the trace of the orthogonalized  $U_{ij}$  tensor.

---

|       | x        | y        | z       | $U(\text{eq})$ |
|-------|----------|----------|---------|----------------|
| N     | 2173(3)  | 6562(6)  | 5233(3) | 46(1)          |
| O     | -507(3)  | 5049(6)  | 4236(2) | 52(1)          |
| C(1)  | 3418(4)  | 6784(9)  | 5974(3) | 49(1)          |
| C(2)  | 4448(5)  | 5093(10) | 6172(4) | 54(1)          |
| C(3)  | 4151(5)  | 3020(9)  | 5572(3) | 53(1)          |
| C(4)  | 2873(5)  | 2745(9)  | 4822(3) | 48(1)          |
| C(5)  | 1904(4)  | 4532(7)  | 4652(3) | 40(1)          |
| C(6)  | 492(4)   | 4363(7)  | 3805(3) | 41(1)          |
| C(7)  | 317(4)   | 6049(8)  | 2841(3) | 41(1)          |
| C(8)  | 1626(4)  | 6390(8)  | 2594(4) | 43(1)          |
| C(9)  | 2062(4)  | 4194(9)  | 2104(3) | 45(1)          |
| C(10) | 3319(5)  | 4733(15) | 1825(5) | 70(2)          |
| C(11) | 873(4)   | 3353(10) | 1130(3) | 49(1)          |
| C(12) | -436(5)  | 3049(9)  | 1339(4) | 49(1)          |
| C(13) | -843(4)  | 5327(8)  | 1802(3) | 41(1)          |
| C(14) | -2283(4) | 5189(10) | 1852(4) | 52(1)          |
| C(15) | -3368(6) | 4437(18) | 788(5)  | 78(2)          |
| C(16) | -2693(6) | 7548(12) | 2221(6) | 73(2)          |

---

Table 3. Bond lengths [ $\text{\AA}$ ] and angles [ $^\circ$ ] for **2c**

---

|                   |          |
|-------------------|----------|
| N-C(1)            | 1.333(5) |
| N-C(5)            | 1.342(5) |
| O-C(6)            | 1.415(5) |
| C(1)-C(2)         | 1.382(7) |
| C(2)-C(3)         | 1.377(7) |
| C(3)-C(4)         | 1.363(6) |
| C(4)-C(5)         | 1.379(6) |
| C(5)-C(6)         | 1.511(5) |
| C(6)-C(7)         | 1.554(6) |
| C(7)-C(8)         | 1.531(6) |
| C(7)-C(13)        | 1.538(6) |
| C(8)-C(9)         | 1.531(6) |
| C(9)-C(11)        | 1.520(6) |
| C(9)-C(10)        | 1.521(6) |
| C(11)-C(12)       | 1.502(6) |
| C(12)-C(13)       | 1.536(6) |
| C(13)-C(14)       | 1.534(6) |
| C(14)-C(16)       | 1.518(7) |
| C(14)-C(15)       | 1.531(7) |
|                   |          |
| C(1)-N-C(5)       | 117.2(4) |
| N-C(1)-C(2)       | 124.5(5) |
| C(3)-C(2)-C(1)    | 117.4(4) |
| C(4)-C(3)-C(2)    | 118.8(5) |
| C(3)-C(4)-C(5)    | 120.7(5) |
| N-C(5)-C(4)       | 121.4(4) |
| N-C(5)-C(6)       | 115.7(3) |
| C(4)-C(5)-C(6)    | 122.9(4) |
| O-C(6)-C(5)       | 110.0(3) |
| O-C(6)-C(7)       | 107.0(3) |
| C(5)-C(6)-C(7)    | 112.4(3) |
| C(8)-C(7)-C(13)   | 108.3(3) |
| C(8)-C(7)-C(6)    | 114.0(3) |
| C(13)-C(7)-C(6)   | 114.6(3) |
| C(9)-C(8)-C(7)    | 114.8(4) |
| C(11)-C(9)-C(10)  | 111.3(4) |
| C(11)-C(9)-C(8)   | 109.7(4) |
| C(10)-C(9)-C(8)   | 111.4(5) |
| C(12)-C(11)-C(9)  | 113.2(3) |
| C(11)-C(12)-C(13) | 112.6(4) |
| C(14)-C(13)-C(12) | 113.3(4) |
| C(14)-C(13)-C(7)  | 116.2(3) |
| C(12)-C(13)-C(7)  | 109.8(3) |
| C(16)-C(14)-C(15) | 109.8(5) |
| C(16)-C(14)-C(13) | 111.6(4) |

C(15)-C(14)-C(13)

112.6(4)

---

Table 4. Anisotropic displacement parameters ( $\text{\AA}^2 \times 10^3$ ) for **2c**.  
The anisotropic displacement factor exponent takes the form:  
 $-2 \pi^2 [ h^2 a^{*2} U_{11} + \dots + 2 h k a^* b^* U_{12} ]$

|       | $U_{11}$ | $U_{22}$ | $U_{33}$ | $U_{23}$ | $U_{13}$ | $U_{12}$ |
|-------|----------|----------|----------|----------|----------|----------|
| N     | 55(2)    | 32(2)    | 50(2)    | -4(2)    | 17(2)    | 0(2)     |
| O     | 62(2)    | 50(2)    | 51(2)    | 6(2)     | 29(2)    | -6(2)    |
| C(1)  | 57(3)    | 40(3)    | 54(2)    | -2(2)    | 23(2)    | -8(2)    |
| C(2)  | 50(3)    | 62(3)    | 50(2)    | 7(3)     | 19(2)    | -5(3)    |
| C(3)  | 61(3)    | 51(3)    | 52(3)    | 8(3)     | 29(3)    | 11(3)    |
| C(4)  | 66(3)    | 37(3)    | 40(2)    | -4(2)    | 18(2)    | 1(3)     |
| C(5)  | 56(2)    | 26(2)    | 42(2)    | 3(2)     | 23(2)    | -1(2)    |
| C(6)  | 57(2)    | 28(2)    | 42(2)    | 0(2)     | 23(2)    | -7(2)    |
| C(7)  | 57(3)    | 27(2)    | 44(2)    | -1(2)    | 23(2)    | 0(2)     |
| C(8)  | 48(3)    | 42(3)    | 41(2)    | 7(2)     | 17(2)    | -4(2)    |
| C(9)  | 49(2)    | 48(3)    | 40(2)    | 9(2)     | 18(2)    | 7(2)     |
| C(10) | 53(3)    | 103(5)   | 61(3)    | 2(4)     | 27(3)    | 6(4)     |
| C(11) | 55(3)    | 59(3)    | 38(2)    | -1(2)    | 21(2)    | 9(2)     |
| C(12) | 58(3)    | 46(3)    | 42(2)    | -6(2)    | 17(2)    | 0(2)     |
| C(13) | 50(2)    | 35(2)    | 38(2)    | 6(2)     | 16(2)    | 3(2)     |
| C(14) | 51(3)    | 59(3)    | 50(3)    | 2(3)     | 23(2)    | 1(3)     |
| C(15) | 51(3)    | 111(6)   | 69(4)    | -2(4)    | 17(3)    | 2(4)     |
| C(16) | 63(4)    | 73(4)    | 91(5)    | 3(4)     | 37(3)    | 17(3)    |

Table 5. Hydrogen coordinates ( $\times 10^4$ ) and isotropic displacement parameters ( $\text{\AA}^2 \times 10^3$ ) for **2c**

|        | x         | y         | z        | U(eq)   |
|--------|-----------|-----------|----------|---------|
| H(1A)  | -587(54)  | 4057(138) | 4610(42) | 105(26) |
| H(1)   | 3639(41)  | 8421(96)  | 6446(28) | 69(14)  |
| H(2)   | 5415(46)  | 5546(90)  | 6750(34) | 78(14)  |
| H(3)   | 4872(47)  | 1803(99)  | 5672(30) | 78(16)  |
| H(4)   | 2583(40)  | 1501(88)  | 4464(30) | 46(13)  |
| H(6)   | 354(34)   | 2473(79)  | 3530(27) | 41(10)  |
| H(7)   | 179(40)   | 7504(86)  | 3165(32) | 53(12)  |
| H(8A)  | 2405(35)  | 6936(74)  | 3228(27) | 37(10)  |
| H(8B)  | 1509(34)  | 7536(81)  | 2022(29) | 43(11)  |
| H(9)   | 2339(40)  | 2762(99)  | 2662(32) | 63(13)  |
| H(10A) | 4181(50)  | 5287(108) | 2466(43) | 85(16)  |
| H(10B) | 3591(45)  | 3545(94)  | 1535(33) | 54(16)  |
| H(10C) | 3029(60)  | 6230(150) | 1193(50) | 137(25) |
| H(11A) | 1157(43)  | 1980(103) | 812(33)  | 61(13)  |
| H(11B) | 735(27)   | 4493(64)  | 539(24)  | 17(8)   |
| H(12A) | -369(35)  | 1853(79)  | 1844(29) | 41(11)  |
| H(12B) | -1140(37) | 2682(83)  | 643(31)  | 56(12)  |
| H(13)  | -908(30)  | 6675(70)  | 1252(26) | 26(9)   |
| H(14)  | -2263(37) | 4078(82)  | 2355(31) | 41(12)  |
| H(15A) | -3354(47) | 5557(103) | 230(40)  | 70(16)  |
| H(15B) | -4323(46) | 4709(103) | 814(34)  | 73(14)  |
| H(15C) | -3205(68) | 2802(160) | 544(59)  | 137(29) |
| H(16A) | -2066(58) | 7876(145) | 2990(48) | 114(22) |
| H(16B) | -2806(59) | 8715(123) | 1694(48) | 106(24) |
| H(16C) | -3716(51) | 7410(112) | 2182(34) | 87(16)  |

## Crystallographic data for compound 6

The structure was solved by direct methods, SHELXS-86<sup>1</sup>, and refined by full matrix least squares using SHELXL-93<sup>2</sup>. Data were corrected for Lorentz and polarization effects but not for absorption. Hydrogen atoms were included in calculated positions with thermal parameters 30% larger than the atom to which they were attached. The non-hydrogen atoms were refined anisotropically. All calculations were performed on a Silicon Graphics R4000 computer. The ORTEX program was used to obtain the drawings<sup>3</sup>.

1. G.M. Sheldrick, *Acta.Cryst.*,(1990).A46,467.
2. G.M. Sheldrick, SHELXL-93 a computer program for crystal structure determination, University of Gottingen 1993.
3. P. McArdle *J. Appl.Cryst.*(1995),28,65.



Table 1. Crystal data and structure refinement for **6**

|                                   |                                                         |
|-----------------------------------|---------------------------------------------------------|
| Identification code               | cs1                                                     |
| Empirical formula                 | C <sub>17</sub> H <sub>27</sub> N O                     |
| Formula weight                    | 261.40                                                  |
| Temperature                       | 293(2) K                                                |
| Wavelength                        | 0.71069 Å                                               |
| Crystal system                    | Orthorhombic                                            |
| Space group                       | P2 <sub>1</sub> 2 <sub>1</sub> 2 <sub>1</sub>           |
| Unit cell dimensions              | a = 10.8957(10)Å<br>b = 11.2627(9)Å<br>c = 13.3035(10)Å |
| Volume                            | 1632.5(2) Å <sup>3</sup>                                |
| Z                                 | 4                                                       |
| Density (calculated)              | 1.064 Mg/m <sup>3</sup>                                 |
| Absorption coefficient            | 0.065 mm <sup>-1</sup>                                  |
| F(000)                            | 576                                                     |
| Crystal size                      | 0.5 x 0.5 x 0.5 mm                                      |
| Theta range for data collection   | 2.37 to 25.96 °.                                        |
| Index ranges                      | 0 ≤ h ≤ 13; 0 ≤ k ≤ 13; 0 ≤ l ≤ 16                      |
| Reflections collected             | 1904                                                    |
| Independent reflections           | 1838 [R(int) = 0.0168]                                  |
| Reflections observed (>2σ)        | 1523                                                    |
| Refinement method                 | Full-matrix least-squares on F <sup>2</sup>             |
| Data / restraints / parameters    | 1838 / 0 / 176                                          |
| Goodness-of-fit on F <sup>2</sup> | 0.925                                                   |
| Final R indices [I>2σ(I)]         | R <sub>1</sub> = 0.0350 wR <sub>2</sub> = 0.1081        |
| R indices (all data)              | R <sub>1</sub> = 0.0434 wR <sub>2</sub> = 0.1155        |
| Absolute structure parameter      | 2(2)                                                    |
| Largest diff. peak and hole       | 0.150 and -0.089 e.Å <sup>-3</sup>                      |

R indices ;  $R_1 = [\sum || F_o | - | F_c | | ] / \sum | F_o |$  (based on F),

$wR_2 = [ [\sum_w ( | F_o - F_c | )^2 ] / [ \sum_w ( | F_o | )^2 ] ]^{1/2}$  (based on F<sup>2</sup>).

$w = q / [ (\sigma F_o)^2 + (a * P)^2 + b * P + d + e * \sin(\theta) ]$ .

Goodness-of-fit =  $[ \sum_w ( | F_o^2 | - | F_c^2 | )^2 / (Nobs - Nparameters) ]^{1/2}$ .

Table 2. Atomic coordinates ( $\times 10^4$ ) and equivalent isotropic displacement parameters ( $\text{\AA}^2 \times 10^3$ ) for **6**. U(eq) is defined as one third of the trace of the orthogonalized Uij tensor.

| Atom  | x        | y       | z       | U(eq)  |
|-------|----------|---------|---------|--------|
| N(1)  | 1124(1)  | 6647(1) | 4649(1) | 56(1)  |
| O(1)  | -661(1)  | 9297(1) | 4585(1) | 62(1)  |
| C(1)  | -2246(2) | 7909(2) | 1924(2) | 73(1)  |
| C(2)  | -1454(3) | 7114(2) | 1268(2) | 85(1)  |
| C(3)  | -118(3)  | 7470(2) | 1284(2) | 78(1)  |
| C(4)  | 425(2)   | 7506(2) | 2349(1) | 57(1)  |
| C(5)  | -366(2)  | 8327(2) | 3010(1) | 51(1)  |
| C(6)  | -1713(2) | 7953(2) | 2978(2) | 60(1)  |
| C(7)  | -3582(3) | 7529(3) | 1944(2) | 99(1)  |
| C(8)  | 1810(2)  | 7791(2) | 2358(2) | 70(1)  |
| C(9)  | 2116(3)  | 8970(2) | 1855(2) | 97(1)  |
| C(10) | 2557(3)  | 6793(3) | 1886(3) | 119(1) |
| C(11) | 88(2)    | 8429(2) | 4102(1) | 50(1)  |
| C(12) | -176(3)  | 9691(2) | 5516(2) | 86(1)  |
| C(13) | 81(2)    | 7263(2) | 4674(1) | 48(1)  |
| C(14) | 1145(2)  | 5597(2) | 5124(2) | 63(1)  |
| C(15) | 166(2)   | 5134(2) | 5625(2) | 68(1)  |
| C(16) | -907(2)  | 5780(2) | 5657(2) | 69(1)  |
| C(17) | -952(2)  | 6863(2) | 5180(1) | 60(1)  |

Table 3. Bond lengths [Å] and angles [°] for **6**

|                   |            |
|-------------------|------------|
| N(1)-C(13)        | 1.331(2)   |
| N(1)-C(14)        | 1.341(3)   |
| O(1)-C(12)        | 1.418(3)   |
| O(1)-C(11)        | 1.426(2)   |
| C(1)-C(7)         | 1.517(3)   |
| C(1)-C(6)         | 1.518(3)   |
| C(1)-C(2)         | 1.519(4)   |
| C(2)-C(3)         | 1.509(4)   |
| C(3)-C(4)         | 1.536(3)   |
| C(4)-C(5)         | 1.540(2)   |
| C(4)-C(8)         | 1.542(3)   |
| C(5)-C(6)         | 1.527(3)   |
| C(5)-C(11)        | 1.539(2)   |
| C(8)-C(9)         | 1.524(3)   |
| C(8)-C(10)        | 1.524(4)   |
| C(11)-C(13)       | 1.519(2)   |
| C(13)-C(17)       | 1.386(3)   |
| C(14)-C(15)       | 1.361(3)   |
| C(15)-C(16)       | 1.377(3)   |
| C(16)-C(17)       | 1.376(3)   |
| <br>              |            |
| C(13)-N(1)-C(14)  | 117.5(2)   |
| C(12)-O(1)-C(11)  | 113.3(2)   |
| C(7)-C(1)-C(6)    | 111.1(2)   |
| C(7)-C(1)-C(2)    | 112.9(2)   |
| C(6)-C(1)-C(2)    | 109.4(2)   |
| C(3)-C(2)-C(1)    | 112.5(2)   |
| C(2)-C(3)-C(4)    | 113.1(2)   |
| C(3)-C(4)-C(5)    | 109.1(2)   |
| C(3)-C(4)-C(8)    | 113.0(2)   |
| C(5)-C(4)-C(8)    | 114.7(2)   |
| C(6)-C(5)-C(11)   | 110.9(2)   |
| C(6)-C(5)-C(4)    | 110.9(2)   |
| C(11)-C(5)-C(4)   | 113.8(2)   |
| C(1)-C(6)-C(5)    | 113.7(2)   |
| C(9)-C(8)-C(10)   | 110.1(2)   |
| C(9)-C(8)-C(4)    | 113.1(2)   |
| C(10)-C(8)-C(4)   | 111.4(2)   |
| O(1)-C(11)-C(13)  | 111.33(13) |
| O(1)-C(11)-C(5)   | 107.05(14) |
| C(13)-C(11)-C(5)  | 113.97(13) |
| N(1)-C(13)-C(17)  | 122.4(2)   |
| N(1)-C(13)-C(11)  | 115.7(2)   |
| C(17)-C(13)-C(11) | 121.9(2)   |
| N(1)-C(14)-C(15)  | 123.7(2)   |

|                   |          |
|-------------------|----------|
| C(14)-C(15)-C(16) | 118.5(2) |
| C(17)-C(16)-C(15) | 118.9(2) |
| C(16)-C(17)-C(13) | 118.9(2) |

Table 4. Anisotropic displacement parameters ( $\text{\AA}^2 \times 10^3$ ) for **6**. The anisotropic displacement

factor exponent takes the form:  $-2 \pi^2 [ h^2 a^{*2} U_{11} + \dots + 2 h k a^* b^* U_{12}$

| Atom  | U11    | U22    | U33    | U23    | U13    | U12    |
|-------|--------|--------|--------|--------|--------|--------|
| N(1)  | 47(1)  | 60(1)  | 62(1)  | 3(1)   | -1(1)  | 3(1)   |
| O(1)  | 75(1)  | 52(1)  | 59(1)  | -10(1) | -2(1)  | 8(1)   |
| C(1)  | 85(1)  | 61(1)  | 73(1)  | 9(1)   | -29(1) | -4(1)  |
| C(2)  | 115(2) | 78(1)  | 62(1)  | -5(1)  | -29(1) | -10(1) |
| C(3)  | 112(2) | 72(1)  | 51(1)  | -5(1)  | -1(1)  | -1(2)  |
| C(4)  | 72(1)  | 49(1)  | 50(1)  | -1(1)  | 2(1)   | -1(1)  |
| C(5)  | 60(1)  | 44(1)  | 50(1)  | 2(1)   | -2(1)  | -1(1)  |
| C(6)  | 61(1)  | 59(1)  | 60(1)  | 0(1)   | -9(1)  | 1(1)   |
| C(7)  | 89(2)  | 94(2)  | 113(2) | 9(2)   | -46(2) | -14(2) |
| C(8)  | 73(1)  | 71(1)  | 67(1)  | -5(1)  | 20(1)  | 1(1)   |
| C(9)  | 102(2) | 91(2)  | 98(2)  | 2(2)   | 28(2)  | -25(2) |
| C(10) | 97(2)  | 105(2) | 155(3) | -29(2) | 37(2)  | 16(2)  |
| C(11) | 52(1)  | 46(1)  | 51(1)  | -3(1)  | 0(1)   | -2(1)  |
| C(12) | 120(2) | 71(1)  | 67(1)  | -20(1) | -6(1)  | 7(2)   |
| C(13) | 47(1)  | 51(1)  | 46(1)  | -2(1)  | -2(1)  | -1(1)  |
| C(14) | 57(1)  | 60(1)  | 73(1)  | 5(1)   | -6(1)  | 10(1)  |
| C(15) | 73(1)  | 57(1)  | 74(1)  | 16(1)  | -7(1)  | 0(1)   |
| C(16) | 61(1)  | 72(1)  | 73(1)  | 18(1)  | 7(1)   | -6(1)  |
| C(17) | 50(1)  | 65(1)  | 64(1)  | 7(1)   | 3(1)   | 7(1)   |

Table 5. Hydrogen coordinates ( $\times 10^4$ ) and isotropic displacement parameters ( $\text{\AA}^2 \times 10^3$ ) for **6**

| Atom   | x        | y         | z        | U(eq) |
|--------|----------|-----------|----------|-------|
| H(1)   | -2211(2) | 8714(2)   | 1645(2)  | 95    |
| H(2A)  | -1528(3) | 6301(2)   | 1500(2)  | 111   |
| H(2B)  | -1753(3) | 7146(2)   | 582(2)   | 111   |
| H(3A)  | -34(3)   | 8248(2)   | 979(2)   | 102   |
| H(3B)  | 348(3)   | 6912(2)   | 881(2)   | 102   |
| H(4)   | 338(2)   | 6704(2)   | 2625(1)  | 74    |
| H(5)   | -319(2)  | 9123(2)   | 2716(1)  | 67    |
| H(6A)  | -1792(2) | 7174(2)   | 3282(2)  | 78    |
| H(6B)  | -2190(2) | 8505(2)   | 3378(2)  | 78    |
| H(7A)  | -3896(7) | 7505(20)  | 1270(3)  | 138   |
| H(7B)  | -4049(4) | 8087(12)  | 2333(15) | 138   |
| H(7C)  | -3646(3) | 6755(9)   | 2241(16) | 138   |
| H(8)   | 2062(2)  | 7853(2)   | 3063(2)  | 91    |
| H(9A)  | 2976(5)  | 9131(10)  | 1930(15) | 136   |
| H(9B)  | 1650(16) | 9594(4)   | 2164(12) | 136   |
| H(9C)  | 1916(20) | 8926(7)   | 1153(4)  | 136   |
| H(10A) | 2378(20) | 6059(5)   | 2223(15) | 166   |
| H(10B) | 3416(3)  | 6968(12)  | 1949(19) | 166   |
| H(10C) | 2348(19) | 6722(17)  | 1187(6)  | 166   |
| H(11)  | 933(2)   | 8728(2)   | 4088(1)  | 65    |
| H(12A) | -699(12) | 10296(14) | 5791(8)  | 121   |
| H(12B) | 631(9)   | 10010(18) | 5412(3)  | 121   |
| H(12C) | -132(19) | 9035(5)   | 5975(6)  | 121   |
| H(14)  | 1869(2)  | 5161(2)   | 5110(2)  | 82    |
| H(15)  | 221(2)   | 4399(2)   | 5939(2)  | 88    |
| H(16)  | -1590(2) | 5488(2)   | 5996(2)  | 89    |
| H(17)  | -1663(2) | 7319(2)   | 5196(1)  | 78    |
